1 **Original paper for Plos One**

2

3 **RELATIONSHIP BETWEEN PARTICIPATION IN DAILY LIFE ACTIVITIES**  
4 **AND PHYSICAL ACTIVITY IN STROKE SURVIVORS: A PROTOCOL FOR A**  
5 **SYSTEMATIC REVIEW AND META-ANALYSES-BASED DATA SYNTHESIS**

6

7 **Short title:** Participation and physical activity in stroke: a protocol for a systematic  
8 review and data synthesis

9

10 **Authors:**

11 ☒ Cristina, de DIEGO-ALONSO <sup>1</sup> –CDA

12 ☒ Julia, BLASCO-ABADÍA <sup>1</sup> – JBA

13 ☒ Almudena, BUESA ESTELLEZ <sup>1</sup> –ABE

14 ☒ Rafael, GINER-NICOLÁS <sup>1</sup> –RGN

15 ☒ María Pilar, LÓPEZ-ROYO <sup>1</sup> –MLR

16 ☒ Patricia, ROLDÁN-PÉREZ <sup>1</sup> –PRP

17 ☒ Víctor, DOMÉNECH-GARCÍA <sup>1</sup> –VDG

18 ☒ Pablo, BELLOSTA-LÓPEZ <sup>1</sup> – PBL

19 ☒ Natalie A, FINI <sup>2</sup> –NF

20

21 **Corresponding author:** Pablo Bellosta-López, Universidad San Jorge. Campus  
22 Universitario, Autov. A23, Km 299, 50830 Villanueva de Gállego, Zaragoza, Spain.  
23 Tel.: (+34) 976 060 100 Fax.: 976 077 581. Email: [pbellosta@usj.es](mailto:pbellosta@usj.es)

24

25 **Affiliations**

26 <sup>1</sup> Universidad San Jorge. Campus Universitario, Autov. A23 km 299, 50830. Villanueva  
27 de Gállego, Zaragoza, Spain.

28 <sup>2</sup> Department of Physiotherapy, Melbourne School of Health Sciences, University of  
29 Melbourne, Melbourne, Victoria, Australia.

30

31 **ABSTRACT**

32 **Background:** Stroke survivors undertake low levels of physical activity and  
33 participation in daily life activities, but there are no reviews on the relationship between  
34 physical activity and participation. This systematic review and meta-analyses-based data  
35 synthesis will aim to cross-sectionally and longitudinally describe and estimate the  
36 relationship between participation in daily life activities and physical activity in stroke  
37 survivors.

38 **Methods and analysis:** This protocol follows the Preferred Reporting Items for  
39 Systematic Review and Meta-Analysis Protocols (PRISMA-P). Six databases (PudMed,  
40 Web of Science, Scopus, PEDro, SPORTDiscus, and Rehabilitation & Sport Medicine  
41 Source) will be searched using terms grouped into three categories: stroke, physical  
42 activity, and participation in daily life activities. Observational and experimental studies  
43 assessing participation and physical activity levels in adult stroke survivors in English  
44 or Spanish will be included. The methodological quality of the studies will be assessed  
45 independently by 2 investigators, with the Newcastle-Ottawa scale. Study and sample  
46 characteristics, and physical activity and participation outcome data will be extracted.  
47 Additionally, if available, repeated measures and correlation values between physical  
48 activity and participation outcomes will be extracted. The Hedges-Olkin method will be  
49 used for pooling correlation values and a random-effects meta-analysis following  
50 restricted maximum likelihood estimation for pooling effect sizes of those studies  
51 prospectively assessing the same measures of participation and physical activity.  
52 Subgroup analyses will be performed if a sufficient number of studies are found.  
53 Heterogeneity between studies results will be analyzed using  $I^2$  statistics, and  
54 publication bias will be examined using funnel plots and Egger's tests.

55 **Discussion:** This will be the first systematic review with meta-analysis-based data  
56 synthesis to provide information on the relationship between physical activity and

57 participation in stroke survivors. Findings are likely to inform, the design of health  
58 prevention protocols and the development of healthy behavior change interventions.

59

60 **Key Words:** physical activity; participation; activities of daily living; stroke;  
61 rehabilitation; relationship; protocol; systematic review; meta-analysis.

62 **INTRODUCTION**

63 Stroke is the second leading cause of death in developed countries and, according to  
64 World Health Organization (WHO) projections, one in four people will suffer a stroke  
65 throughout their lifetime [1]. In survivors, stroke is the third leading cause of disability  
66 worldwide [2] as it often leads to serious sequelae including sensory-motor, cognitive  
67 and emotional impairments [3], which require neurorehabilitation [4]. For example,  
68 two-thirds show difficulty in walking independently, which is maintained beyond 3  
69 months post-stroke [5]. These post-stroke sequelae generate limitations in activities, and  
70 restrict participation in daily life activities such as social or leisure activities [6, 7].  
71 While immediate post-stroke sequelae might be inevitable, the subsequent sedentary  
72 lifestyle often observed in stroke survivors is believed to be modifiable [8]. Therefore,  
73 participation and physical activity (PA) are key targets for a healthy lifestyle in stroke  
74 survivors.

75         Participation is defined by the International Classification of Functioning,  
76 Disability and Health (ICF) as a person's involvement in life situations, which means an  
77 interaction between the individual's health condition and contextual factors (i.e.,  
78 environmental and personal factors) [9, 10]. In addition, participation implies the  
79 performance of meaningful activities, habits, role performance, and social and  
80 community involvement [11]. Restoration of participation and functional levels is the  
81 main goal in occupational therapy [12]. However, the evidence regarding factors  
82 influencing the recovery of participation in daily life activities is limited. Commonly  
83 work, leisure, and domestic activities are the most affected after stroke [13, 14].

84         Physical activity is defined by the WHO as “any bodily movement produced by  
85 skeletal muscles that requires energy expenditure”, therefore, includes all movement  
86 during leisure time, for transport to get to and from places, or as part of a person's work

87 and domestic duties [15]. Physical activity can involve different intensities, such as  
88 light, moderate, and vigorous-intensity PA [15]. Following stroke, survivors are  
89 commonly inactive and have significantly increased sedentary lifestyles [16-18],  
90 spending long periods without activity, which may be related to the effects of the stroke  
91 [19]. In essence, post stroke PA levels are lower than that recommended by the WHO  
92 for preventing diseases such as stroke [20].

93 It has been observed that a greater capacity for functional independence implies  
94 greater participation, with the ability to walk and drive, as well as having an extensive  
95 social network, being considered enablers [21]. However, it has been shown that despite  
96 increased physical functioning, most people continue to have participation restrictions  
97 in social and leisure [21], work [22], and housekeeping activities [23], which generates  
98 a high level of concern for stroke survivors [24].

99 A previous review recommended that studies must include several  
100 complementary assessment tools to globally record the level of participation and PA to  
101 establish a complete correlation between these variables [25, 26]. To date, no systematic  
102 review has been conducted to synthesize the evidence on the relationship between  
103 participation and PA in stroke survivors. Therefore, the objective of this systematic  
104 review will be to cross-sectionally investigate and estimate the relationship between  
105 participation in the different activities of daily living and PA. Furthermore, a secondary  
106 aim will be to quantify participation and PA level trajectories and describe whether they  
107 follow a similar pattern over time.

108

109

110 **MATERIALS AND METHODS**

111

112 **Study design and registration**

113 This protocol follows the Preferred Reporting Items for Systematic Review and Meta-  
114 Analysis Protocols (PRISMA-P) [27] and it was registered in the International  
115 Prospective Register of Systematic Reviews (PROSPERO) database  
116 (CRD42022360711).

117

118 **Eligibility criteria**

119 *Study types*

120 Observational (e.g., cross-sectional, case-control, cohort studies) and experimental  
121 studies (e.g., randomized control trials, randomised cross-over trials), evaluating  
122 participation and PA levels in stroke survivors will be included. Only articles with full-  
123 text is available and published in a peer-reviewed journal in English or Spanish  
124 languages will be included. The search will not be limited by date of publication, but  
125 only studies with a sample size higher than 10 participants will be included.

126 Studies with a prospective design including repeated measures of participation  
127 and PA measures across a follow-up period will be selected for inclusion in the data  
128 synthesis to quantify trajectories over time.

129

130 *Participants characteristics*

131 Studies recruiting adult participants ( $\geq 18$  years) with stroke diagnosis regardless of time  
132 since stroke or severity of stroke sequelae, the aetiology, sex, or geographical location  
133 will be included. Studies with mixed populations with composite data will be excluded,  
134 unless stroke data is able to be extracted separately.

135

136 *Characteristics of the outcome measures*

137 Studies reporting PA data (e.g., minutes of PA at different intensities, caloric  
138 expenditure per PA, steps, sitting/standing time) measured by objective devices (e.g.,  
139 podometers, accelerometers), self-reported questionnaires or observational tools and,  
140 degree of participation in at least at least one area of daily living activity according to  
141 the occupational therapy framework: basic activities and instrumental activities of daily  
142 living, rest and sleep , education, work, play, leisure, or social participation [11] will be  
143 included. Studies only including physical performance tests will be excluded, as these  
144 cannot be considered as direct indicators of PA.

145

146 **Data sources and searches**

147 A search will be carried in six electronic databases (PudMed, Web of Science, Scopus,  
148 PEDro, SPORTDiscus and Rehabilitation & Sport Medicine Source). Search terms will  
149 be grouped into three categories: stroke-related words, PA terms, and participation in  
150 daily life activities. The PubMed search strategy is provided in S1 Appendix.

151 To identify additional records, a detailed review of the bibliographic references  
152 included in the full-text reviewed articles will be performed.

153

154 **Study selection**

155 After removing duplicates, the first step will consist of screening studies by titles and  
156 abstracts. Next, full texts will be reviewed and evaluated by applying the eligibility  
157 criteria. Studies will be selected at each step by 2 independent researchers (CDA and  
158 ABE), and, in case of disagreement, a consensus will be sought by a third researcher  
159 (PBL).

160

161 **Evaluation of the methodological quality of the studies**

162 Two researchers (CDA and PRP) will independently examine the methodological  
163 quality of the studies using the Newcastle-Ottawa scale [28]. A third researcher (PBL)  
164 will verify the assessments and resolve discrepancies if any arise.

165 The Newcastle-Ottawa scale evaluates seven to eight items categorized into  
166 three criteria (selection, comparability, and exposure or outcome) with a maximum  
167 score of 9 (10 in the case of cross-sectional studies). Articles scoring at least 7 will be  
168 classified as “high quality”, 4-6 as “fair quality”, and less than 4 as “poor quality” [28].  
169 Due to the observational nature of this review, clinical trials will be also evaluated with  
170 the Newcastle-Ottawa scale for prospective studies.

171

172 **Data collection**

173 Two independent researchers (CDA and RGN) will extract data from the selected  
174 studies using a standardised data extraction sheet, while a third and fourth researcher  
175 (PBL and JBA) will create independent data bases, verify that the extracted data match,  
176 and resolve any discrepancies.

177 The following data will be collected: general study information (title, authors,  
178 year of publication); sample and subgroup characteristics (sample size, mean age and  
179 sex, time since stroke, stroke severity); study characteristics (research design and  
180 country); outcome measures (timing of measurement, PA objective device, PA self-  
181 reported assessments, participation assessments); intervention, if any; outcome data (PA  
182 and participation). In addition, main results, including correlation or association  
183 findings between participation and PA outcomes will be extracted when possible.



184 Furthermore, when possible, the mean and standard deviation at baseline (first  
185 assessment available) and follow-up endpoints from prospective studies will be  
186 extracted for participation and physical activity outcomes. In cases where the data is not  
187 reported directly in an article, up to three attempts will be made to contact the study  
188 authors via email to obtain the data. Where available, medians and interquartile ranges  
189 will be extracted and transformed into mean and standard deviation [29].

190

### 191 **Data synthesis**

192 When there is at least two studies that report a correlation between the same  
193 participation and PA outcomes, the weighted summary of correlation coefficients under  
194 the random effects model will be calculated using the Hedges-Olkin method, based on a  
195 Fisher Z transformation of the correlation coefficients [30].

196 When a minimum of two prospective studies with at least two independent  
197 cohorts examining the same participation and PA outcomes, repeated-measures, Hedges'  
198  $g$  effect sizes will be calculated (i.e., the result of subtracting the baseline mean minus  
199 the follow-up mean, divided by the averaged standard deviation weighted by sample  
200 size) [31] and pooled with a random-effects meta-analysis following a restricted  
201 maximum-likelihood estimation [32]. Absolute values of effect size will be considered  
202 small ( $g \geq 0.20$  &  $< 0.50$ ), medium ( $g \geq 0.50$  &  $< 0.80$ ) or large ( $g \geq 0.80$ ) [33]. If  
203 sufficient studies are found, subgroup analysis will be performed according to areas of  
204 participation and/or PA measurement method (i.e., self-reported or objective measures).  
205 Moreover, age, sex, and/or methodological quality will be included in the analysis as  
206 moderators.

207 Heterogeneity between studies' results will be investigated using  $I^2$  statistics with  
208 values >50% indicating substantial heterogeneity across studies [34]. Publication bias  
209 will be examined by using funnel plots and Egger's tests [35].

210

211 **DISCUSSION**

212 Recent estimates predict a high increase in the number of stroke survivors worldwide by  
213 2040-2050 [2, 36-41]. This highlights the need to target participation in daily activities  
214 and PA levels for secondary prevention. A low level of PA is one of the main risk  
215 factors for relapse, which, together with the level of participation in daily life activities,  
216 is an indicator of the quality of life. Furthermore, a low PA level is related to the degree  
217 of independence and has therefore an impact on health expenditure [42]. Considering the  
218 current situation and the demand from the WHO [43], it is urgent to update and  
219 synthesise the information available to date. Moreover, there is no systematic review  
220 with meta-analysis providing information on the relationship between PA levels and  
221 participation. To date these , data have been analysed separately[6, 44-48] in the stroke  
222 population.

223 This protocol describes the methodology that will be used to conduct the first  
224 systematic review with a meta-analysis-based data synthesis on the relationship between  
225 participation in daily life activities and PA in stroke survivors. The results obtained will  
226 potentially have a major impact on current knowledge by synthesising the information  
227 from all the publications to date, which will lay the foundations for future research and  
228 public health protocols in stroke survivors. Moreover, the results obtained will provide  
229 valuable insights into the important relationship between PA levels and participation  
230 which will help our understanding of this complex population and complex behaviours.

231 It should be noted that this systematic review will have some limitations.  
232 Research that uses a synonym for participation or PA may be missed by our searches. It  
233 is also possible that this review will not find a large number of high-quality publications  
234 that establish correlations between both elements.

235 **REFERENCES**

- 236 1. Feigin VL, Nguyen G, Cercy K, Johnson CO, Alam T, Parmar PG, et al. Global,  
237 Regional, and Country-Specific Lifetime Risks of Stroke, 1990 and 2016. *The New*  
238 *England journal of medicine*. 2018;379(25):2429-37. Epub 2018/12/24. doi:  
239 10.1056/NEJMoa1804492. PubMed PMID: 30575491; PubMed Central PMCID:  
240 PMC6247346.
- 241 2. Global, regional, and national burden of stroke and its risk factors, 1990-2019: a  
242 systematic analysis for the Global Burden of Disease Study 2019. *Lancet Neurol*.  
243 2021;20(10):795-820. Epub 2021/09/07. doi: 10.1016/s1474-4422(21)00252-0.  
244 PubMed PMID: 34487721; PubMed Central PMCID: PMC68443449.
- 245 3. Sacco RL, Kasner SE, Broderick JP, Caplan LR, Connors JJ, Culebras A, et al. An  
246 updated definition of stroke for the 21st century: a statement for healthcare  
247 professionals from the American Heart Association/American Stroke Association.  
248 *Stroke*. 2013;44(7):2064-89. Epub 2013/05/09. doi:  
249 10.1161/STR.0b013e318296aeca. PubMed PMID: 23652265.
- 250 4. Cieza A, Causey K, Kamenov K, Hanson SW, Chatterji S, Vos T. Global estimates  
251 of the need for rehabilitation based on the Global Burden of Disease study 2019: a  
252 systematic analysis for the Global Burden of Disease Study 2019. *Lancet*.  
253 2021;396(10267):2006-17. Epub 2020/12/05. doi: 10.1016/s0140-6736(20)32340-  
254 0. PubMed PMID: 33275908; PubMed Central PMCID: PMC6811204.
- 255 5. Kennedy C, Bernhardt J, Churilov L, Collier JM, Ellery F, Rethnam V, et al.  
256 Factors associated with time to independent walking recovery post-stroke.  
257 2021;92(7):702-8. doi: 10.1136/jnnp-2020-325125 %J *Journal of Neurology,*  
258 *Neurosurgery & Psychiatry*.

- 259 6. Ezekiel L, Collett J, Mayo NE, Pang L, Field L, Dawes H. Factors Associated With  
260 Participation in Life Situations for Adults With Stroke: A Systematic Review.  
261 Archives of physical medicine and rehabilitation. 2019;100(5):945-55. Epub  
262 2018/07/08. doi: 10.1016/j.apmr.2018.06.017. PubMed PMID: 29981316.
- 263 7. Martin-Saez MM, James N. The experience of occupational identity disruption post  
264 stroke: a systematic review and meta-ethnography. Disability and rehabilitation.  
265 2021;43(8):1044-55. Epub 2019/08/03. doi: 10.1080/09638288.2019.1645889.  
266 PubMed PMID: 31373246.
- 267 8. English C, Manns PJ, Tucak C, Bernhardt J. Physical activity and sedentary  
268 behaviors in people with stroke living in the community: a systematic review. Phys  
269 Ther. 2014;94(2):185-96. Epub 2013/09/14. doi: 10.2522/ptj.20130175. PubMed  
270 PMID: 24029302.
- 271 9. Hemmingsson H, Jonsson H. An occupational perspective on the concept of  
272 participation in the International Classification of Functioning, Disability and  
273 Health--some critical remarks. Am J Occup Ther. 2005;59(5):569-76. Epub  
274 2005/11/05. doi: 10.5014/ajot.59.5.569. PubMed PMID: 16268024.
- 275 10. Wu Cy, Lin Kc. Defining occupation: A comparative analysis. Journal of  
276 Occupational Science. 1999;6(1):5-12. doi: 10.1080/14427591.1999.9686446.
- 277 11. Occupational Therapy Practice Framework: Domain and Process-Fourth Edition.  
278 Am J Occup Ther. 2020;74(Supplement\_2):7412410010p1-p87. Epub 2020/08/01.  
279 doi: 10.5014/ajot.2020.74S2001. PubMed PMID: 34780625.
- 280 12. Mackenzie L, Coppola S, Alvarez L, Cibule L, Maltsev S, Loh SY, et al.  
281 International Occupational Therapy Research Priorities. OTJR : occupation,  
282 participation and health. 2017;37(2):72-81. Epub 2017/01/14. doi:  
283 10.1177/1539449216687528. PubMed PMID: 28081694.

- 284 13. Carod-Artal FJ, González-Gutiérrez JL, Herrero JA, Horan T, De Seijas EV.  
285 Functional recovery and instrumental activities of daily living: follow-up 1-year  
286 after treatment in a stroke unit. *Brain injury*. 2002;16(3):207-16. Epub 2002/03/05.  
287 doi: 10.1080/02699050110103337. PubMed PMID: 11874614.
- 288 14. Engel-Yeger B, Tse T, Josman N, Baum C, Carey LM. Scoping Review: The  
289 Trajectory of Recovery of Participation Outcomes following Stroke. *Behav Neurol*.  
290 2018;2018:5472018. Epub 2018/10/03. doi: 10.1155/2018/5472018. PubMed  
291 PMID: 30271506; PubMed Central PMCID: PMC6151208.
- 292 15. Bull FC, Al-Ansari SS, Biddle S, Borodulin K, Buman MP, Cardon G, et al. World  
293 Health Organization 2020 guidelines on physical activity and sedentary behaviour.  
294 *British journal of sports medicine*. 2020;54(24):1451-62. Epub 2020/11/27. doi:  
295 10.1136/bjsports-2020-102955. PubMed PMID: 33239350; PubMed Central  
296 PMCID: PMC7719906.
- 297 16. Fini NA, Holland AE, Keating J, Simek J, Bernhardt J. How Physically Active Are  
298 People Following Stroke? Systematic Review and Quantitative Synthesis. *Phys*  
299 *Ther*. 2017;97(7):707-17. Epub 2017/04/27. doi: 10.1093/ptj/pzx038. PubMed  
300 PMID: 28444348.
- 301 17. Hassett L, Ada L, Hellweg S, Paul S, Alzahrani M, Dean C. Active and sedentary  
302 bouts in people after stroke and healthy controls: An observational study.  
303 *Physiother Res Int*. 2020;25(3):e1845. Epub 2020/04/18. doi: 10.1002/pri.1845.  
304 PubMed PMID: 32301560.
- 305 18. English C, Healy GN, Coates A, Lewis L, Olds T, Bernhardt J. Sitting and Activity  
306 Time in People With Stroke. *Phys Ther*. 2016;96(2):193-201. Epub 2015/06/27.  
307 doi: 10.2522/ptj.20140522. PubMed PMID: 26112254.

- 308 19. Billinger SA, Arena R, Bernhardt J, Eng JJ, Franklin BA, Johnson CM, et al.  
309 Physical activity and exercise recommendations for stroke survivors: a statement  
310 for healthcare professionals from the American Heart Association/American Stroke  
311 Association. *Stroke*. 2014;45(8):2532-53. Epub 2014/05/23. doi:  
312 10.1161/str.0000000000000022. PubMed PMID: 24846875.
- 313 20. WHO. Global action plan for the prevention and control of noncommunicable  
314 diseases 2013-2020. Ginebra. 2013.
- 315 21. Norlander A, Carlstedt E, Jönsson AC, Lexell EM, Ståhl A, Lindgren A, et al.  
316 Long-Term Predictors of Social and Leisure Activity 10 Years after Stroke. *PloS*  
317 *one*. 2016;11(2):e0149395. Epub 2016/02/24. doi: 10.1371/journal.pone.0149395.  
318 PubMed PMID: 26901501; PubMed Central PMCID: PMC4765767.
- 319 22. O'Brien AN, Wolf TJ. Determining work outcomes in mild to moderate stroke  
320 survivors. *Work (Reading, Mass)*. 2010;36(4):441-7. Epub 2010/08/18. doi:  
321 10.3233/wor-2010-1047. PubMed PMID: 20714100.
- 322 23. Svensson JS, Westerlind E, Persson HC, Sunnerhagen KS. Occupational gaps 5  
323 years after stroke. *Brain and behavior*. 2019;9(3):e01234. Epub 2019/02/21. doi:  
324 10.1002/brb3.1234. PubMed PMID: 30784220; PubMed Central PMCID:  
325 PMC6422817.
- 326 24. Bergström A, Guidetti S, Tham K, Eriksson G. Association between satisfaction  
327 and participation in everyday occupations after stroke. *Scandinavian journal of*  
328 *occupational therapy*. 2017;24(5):339-48. Epub 2016/10/25. doi:  
329 10.1080/11038128.2016.1245782. PubMed PMID: 27774829.
- 330 25. Kessler D, Egan M. A Review of Measures to Evaluate Participation Outcomes  
331 Post-Stroke. 2012;75(9):403-11. doi: 10.4276/030802212x13470263980757.

- 332 26. Tse T, Douglas J, Lentin P, Carey L. Measuring Participation After Stroke: A  
333 Review of Frequently Used Tools. *Archives of Physical Medicine and*  
334 *Rehabilitation*. 2013;94(1):177-92. doi: 10.1016/j.apmr.2012.09.002.
- 335 27. Shamseer L, Moher D, Clarke M, Ghersi D, Liberati A, Petticrew M, et al.  
336 Preferred reporting items for systematic review and meta-analysis protocols  
337 (PRISMA-P) 2015: elaboration and explanation. *BMJ*. 2015;350:g7647. Epub  
338 2015/01/04. doi: 10.1136/bmj.g7647. PubMed PMID: 25555855.
- 339 28. Deeks JJ, Dinnes J, D'Amico R, Sowden AJ, Sakarovitch C, Song F, et al.  
340 Evaluating non-randomised intervention studies. *Health technology assessment*  
341 (Winchester, England). 2003;7(27):iii-x, 1-173. PubMed PMID:  
342 MEDLINE:14499048.
- 343 29. Wan X, Wang W, Liu J, Tong T. Estimating the sample mean and standard  
344 deviation from the sample size, median, range and/or interquartile range. *BMC Med*  
345 *Res Methodol*. 2014;14:135. Epub 2014/12/20. doi: 10.1186/1471-2288-14-135.  
346 PubMed PMID: 25524443; PubMed Central PMCID: PMC4383202.
- 347 30. Hedges LV, Olkin I. CHAPTER 11 - Combining Estimates of Correlation  
348 Coefficients. In: Hedges LV, Olkin I, editors. *Statistical Methods for Meta-*  
349 *Analysis*. San Diego: Academic Press; 1985. p. 223-46.
- 350 31. Lakens D. Calculating and reporting effect sizes to facilitate cumulative science: a  
351 practical primer for t-tests and ANOVAs. *Front Psychol*. 2013;4:863. Epub  
352 2013/12/11. doi: 10.3389/fpsyg.2013.00863. PubMed PMID: 24324449; PubMed  
353 Central PMCID: PMC43840331.
- 354 32. Veroniki AA, Jackson D, Viechtbauer W, Bender R, Bowden J, Knapp G, et al.  
355 Methods to estimate the between-study variance and its uncertainty in meta-  
356 analysis. *Res Synth Methods*. 2016;7(1):55-79. Epub 2015/09/04. doi:



- 357 10.1002/jrsm.1164. PubMed PMID: 26332144; PubMed Central PMCID:  
358 PMCPMC4950030.
- 359 33. Cohen J. Statistical Power Analysis for the Behavioral Sciences. New York, NY:  
360 Routledge Academic; 1988.
- 361 34. Higgins JP, Thompson SG, Deeks JJ, Altman DG. Measuring inconsistency in  
362 meta-analyses. *BMJ*. 2003;327(7414):557-60. Epub 2003/09/06. doi:  
363 10.1136/bmj.327.7414.557. PubMed PMID: 12958120; PubMed Central PMCID:  
364 PMCPMC192859.
- 365 35. Sterne JA, Egger M, Smith GD. Systematic reviews in health care: Investigating  
366 and dealing with publication and other biases in meta-analysis. *BMJ*.  
367 2001;323(7304):101-5. Epub 2001/07/14. doi: 10.1136/bmj.323.7304.101. PubMed  
368 PMID: 11451790; PubMed Central PMCID: PMCPMC1120714.
- 369 36. Wafa HA, Wolfe CDA, Emmett E, Roth GA, Johnson CO, Wang Y. Burden of  
370 Stroke in Europe: Thirty-Year Projections of Incidence, Prevalence, Deaths, and  
371 Disability-Adjusted Life Years. *Stroke*. 2020;51(8):2418-27. Epub 2020/07/11. doi:  
372 10.1161/strokeaha.120.029606. PubMed PMID: 32646325; PubMed Central  
373 PMCID: PMCPMC7382540.
- 374 37. Yao M, Ren Y, Jia Y, Xu J, Wang Y, Zou K, et al. Projected burden of stroke in  
375 China through 2050. *Chin Med J (Engl)*. 2022. Epub 2022/12/30. doi:  
376 10.1097/cm9.0000000000002060. PubMed PMID: 36580638.
- 377 38. Pacheco-Barrios K, Giannoni-Luza S, Navarro-Flores A, Rebello-Sanchez I,  
378 Parente J, Balbuena A, et al. Burden of Stroke and Population-Attributable  
379 Fractions of Risk Factors in Latin America and the Caribbean. *J Am Heart Assoc*.  
380 2022;11(21):e027044. Epub 2022/10/27. doi: 10.1161/jaha.122.027044. PubMed  
381 PMID: 36285788; PubMed Central PMCID: PMCPMC9673624.

- 382 39. Economic DA. No Postcode Untouched Stroke in Australia 2020.2020.
- 383 40. Ben Shoham A, Liberant-Taub S, Sharon M, Zucker I. The number of acute  
384 cerebrovascular events in Israel: a forecast until 2040. *Isr J Health Policy Res.*  
385 2019;8(1):67. Epub 2019/10/02. doi: 10.1186/s13584-019-0337-1. PubMed PMID:  
386 31570095; PubMed Central PMCID: PMC6771084.
- 387 41. Al-Senani F, Al-Johani M, Salawati M, Alhazzani A, Morgenstern LB, Seguel  
388 Ravest V, et al. An Epidemiological Model for First Stroke in Saudi Arabia. *J*  
389 *Stroke Cerebrovasc Dis.* 2020;29(1):104465. Epub 2019/11/11. doi:  
390 10.1016/j.jstrokecerebrovasdis.2019.104465. PubMed PMID: 31704123.
- 391 42. Rochmah TN, Rahmawati IT, Dahlui M, Budiarto W, Bilqis N. Economic Burden  
392 of Stroke Disease: A Systematic Review. *International journal of environmental*  
393 *research and public health.* 2021;18(14). Epub 2021/07/25. doi:  
394 10.3390/ijerph18147552. PubMed PMID: 34299999; PubMed Central PMCID:  
395 PMC678307880.
- 396 43. Organization WH. Global action plan on physical activity 2018-2030: more active  
397 people for a healthier world: World Health Organization; 2019.
- 398 44. Della Vecchia C, Viprey M, Haesebaert J, Termoz A, Giroudon C, Dima A, et al.  
399 Contextual determinants of participation after stroke: a systematic review of  
400 quantitative and qualitative studies. *Disability and rehabilitation.*  
401 2021;43(13):1786-98. Epub 2019/10/28. doi: 10.1080/09638288.2019.1679897.  
402 PubMed PMID: 31646906.
- 403 45. Mole JA, Demeyere N. The relationship between early post-stroke cognition and  
404 longer term activities and participation: A systematic review. *Neuropsychological*  
405 *rehabilitation.* 2020;30(2):346-70. Epub 2018/05/02. doi:  
406 10.1080/09602011.2018.1464934. PubMed PMID: 29712538.

- 407 46. Espenberger KR, Fini NA, Peiris CL. Personal and social factors that influence  
408 physical activity levels in community-dwelling stroke survivors: A systematic  
409 review of qualitative literature. *Clinical rehabilitation*. 2021;35(7):1044-55. Epub  
410 2021/02/16. doi: 10.1177/0269215521993690. PubMed PMID: 33586479.
- 411 47. Penna LG, Pinheiro JP, Ramalho SHR, Ribeiro CF. Effects of aerobic physical  
412 exercise on neuroplasticity after stroke: systematic review. *Arquivos de neuro-  
413 psiquiatria*. 2021;79(9):832-43. Epub 2021/10/21. doi: 10.1590/0004-282x-anp-  
414 2020-0551. PubMed PMID: 34669820.
- 415 48. Kringle EA, Barone Gibbs B, Campbell G, McCue M, Terhorst L, Kersey J, et al.  
416 Influence of Interventions on Daily Physical Activity and Sedentary Behavior after  
417 Stroke: A Systematic Review. *PM & R : the journal of injury, function, and  
418 rehabilitation*. 2020;12(2):186-201. Epub 2019/07/23. doi: 10.1002/pmrj.12222.  
419 PubMed PMID: 31329372.
- 420
